# Supplementary material for: Effect of Prolonged Emergency Department Stays on Mortality and In-Hospital Complications in Geriatric Patients: A Prospective Analysis
Source: Research Square preprint supplement (doi:10.21203/rs.3.rs-7447041/v1), 2025-09-10
Supplement: Supplementary file 1 [file 154c170981e452a4f7814551.docx]

**Additional file 1**

**Table S1**. Test performance by the number of positive baseline risk factors on ED admission for predicting in-hospital complications.

| Threshold (≥n factors) | Sensitivity % (95% CI) | Specificity % (95% CI) | PPV %  (95% CI) | NPV %  (95% CI) |
| --- | --- | --- | --- | --- |
| ≥1 | 100.0 (—) | 0.0 (—) | 26.8 (—) | — |
| ≥2 | 91.8 (86.8–95.3) | 23.1 (19.4–27.3) | 29.5 (25.4–34.0) | 89.1 (84.9–92.2) |
| ≥3 | 81.1 (74.8–86.3) | 36.6 (32.4–41.1) | 31.2 (26.8–36.0) | 84.5 (80.0–88.1) |
| ≥4 | 68.4 (61.5–74.7) | 53.1 (48.5–57.6) | 34.3 (29.0–40.0) | 83.7 (79.4–87.3) |
| ≥5 | 49.5 (42.5–56.5) | 73.3 (69.1–77.2) | 40.3 (33.3–47.6) | 81.7 (77.9–85.0) |
| ≥6 | 30.6 (24.3–37.6) | 91.8 (88.8–94.1) | 54.7 (43.4–65.6) | 79.0 (75.4–82.2) |

**Notes:** Positive risk factors were prespecified as NEWS-2 ≥5, CCI ≥8, CFS ≥6, impaired general condition, infection at presentation, and chronic kidney disease (CI, confidence interval; NPV, negative predictive value; PPV, positive predictive value).
